# Supplementary material for: Synthesis, enzyme inhibitory kinetics mechanism and computational study of N-(4-methoxyphenethyl)-N-(substituted)-4-methylbenzenesulfonamides as novel therapeutic agents for Alzheimer’s disease
Source: PeerJ. 2018 Jun 26;6:e4962. doi: 10.7717/peerj.4962 (PMC6025150; doi:10.7717/peerj.4962)
Supplement: Data S2 [file peerj-06-4962-s003.xlsx]

## Sheet: Raw data of (5c) kinetic
				Compound Concentrations, Vmax (1/V)
				0.00 µM	0.075 µM	0.15 µM									Slope
	Substrate Concentrations			730.008	994.096	1136.29									0.00 µM	853.172
	0.25			985.133	1353.4	1514.8									0.075 µM	1360.1
	0.5			1410.2	2004.13	2227.02									0.15 µM	1563.63
	1			2203.38	3323.6	3687.56
	2			3964.92	5882.71	6343.71
	4			7359.44	11587.8	13371.1
	8
			0.00 µM	0.075 µM	0.15 µM
		0.25	730.008	994.096	1136.29
		0.5	985.133	1353.4	1514.8
		1	1410.2	2004.13	2227.02
		2	2203.38	3323.6	3687.56
		4	3964.92	5882.71	6343.71
		8	7359.44	11587.8	13371.1
		SLOPE	853.172	1360.1	1563.63
																																								11566
